# Supplementary material for: The Effects of Foam Rolling Training on Performance Parameters: A Systematic Review and Meta-Analysis including Controlled and Randomized Controlled Trials
Source: MDPI journal article supplement (doi:10.3390/ijerph191811638), 2022-09-15
Supplement: s1 [file s1]

**Table S1.** Search codes in the respective databases.

| Database         | Search code                                                                                                                                                                                                                                                                                                                                                                                                                                                                                                                                                                                                                                                                                             |
|------------------|---------------------------------------------------------------------------------------------------------------------------------------------------------------------------------------------------------------------------------------------------------------------------------------------------------------------------------------------------------------------------------------------------------------------------------------------------------------------------------------------------------------------------------------------------------------------------------------------------------------------------------------------------------------------------------------------------------|
| Scopus           | TITLE-ABS-KEY ( ( "Chronic effects" OR "training effects" OR effects OR "long-term" OR intervention ) AND ( "foam rolling" OR "self-myofascial release" OR "roller massage" OR "foam roller" ) AND ( "performance" OR "strength" OR "force" OR "hypertrophy" OR "power" OR "torque" OR "height" OR "RFD" OR "rate of force development" OR "jump" OR maximum OR maximal ) )                                                                                                                                                                                                                                                                                                                             |
| Pubmed           | ("Chronic effects"[Title/Abstract] OR "training effects"[Title/Abstract] OR effects[Title/Abstract] OR "long-term"[Title/Abstract] OR intervention[Title/Abstract]) AND ("foam rolling"[Title/Abstract] OR "self-myofascial release"[Title/Abstract] OR "roller massage"[Title/Abstract] OR "foam roller"[Title/Abstract]) AND ("performance"[Title/Abstract] OR "strength"[Title/Abstract] OR "force"[Title/Abstract] OR "hypertrophy"[Title/Abstract] OR "power"[Title/Abstract] OR "torque"[Title/Abstract] OR "height"[Title/Abstract] OR "RFD"[Title/Abstract] OR "rate of force development"[Title/Abstract] OR "jump"[Title/Abstract] OR maximum[Title/Abstract] OR maximal [Title/Abstract])))) |
| Web of Science   | TS=( ( "Chronic effects" OR "training effects" OR effects OR "long-term" OR intervention ) AND ( "foam rolling" OR "self-myofascial release" OR "roller massage" OR "foam roller" ) AND ( "performance" OR "strength" OR "force" OR "hypertrophy" OR "power" OR "torque" OR "height" OR "RFD" OR "rate of force development" OR "jump" OR maximum OR maximal ) )                                                                                                                                                                                                                                                                                                                                        |
| Cochrane Library | (( "Chronic effects" OR "training effects" OR effects OR "long-term" OR intervention ) AND ( "foam rolling" OR "self-myofascial release" OR "roller massage" OR "foam roller" ) AND ( "performance" OR "strength" OR "force" OR "hypertrophy" OR "power" OR "torque" OR "height" OR "RFD" OR "rate of force development" OR "jump" OR maximum OR maximal ) )                                                                                                                                                                                                                                                                                                                                            |
